# Supplementary material for: Two porous Ni-MOFs based on 2,4,6-tris(pyridin-4-yl)-1,3,5-triazine showing solvent determined structures and distinctive sorption properties toward CO2 and alkanes
Source: Royal Society of Chemistry journal article supplement (doi:10.1039/d1dt00136a), 2021-01-01
Supplement: d1dt00136a1.pdf [file d1dt00136a1.pdf]

**Two porous Ni-MOFs based on 2,4,6-tris(pyridin-4-yl)-1,3,5-triazine  
showing solvent determined structures and distinctive sorption  
properties toward CO<sub>2</sub> and alkanes**

Bin-Bin Qian,<sup>a</sup> Peng-Chao Song,<sup>b</sup> Hong-Xiang Nie,<sup>a</sup> Bo Zhang,<sup>a</sup> Jin-Yu Zheng<sup>c</sup>, Mei-Hui Yu,<sup>\*a</sup> and Ze Chang<sup>\*a</sup>

<sup>a</sup> *School of Materials Science and Engineering, Tianjin Key Laboratory of Metal and Molecule-Based Material Chemistry, Nankai University, Tianjin 300350, China.*

*E-mail: mh@nankai.edu.cn; changze@nankai.edu.cn*

<sup>b</sup> *Yantai Engineering & Technology College, Yantai, 264006 China.*

<sup>c</sup> *State Key Laboratory of Catalytic Materials and Reaction Engineering, SINOPEC Research Institute of Petroleum Processing, Beijing 100083, China*

**Table 1** Crystal data and structure refinement details for **1** and **2**

| Compounds                                                                                         | <b>1</b>                                                                          | <b>2</b>                                                                        |
|---------------------------------------------------------------------------------------------------|-----------------------------------------------------------------------------------|---------------------------------------------------------------------------------|
| Formula                                                                                           | C <sub>37.42</sub> H <sub>38</sub> N <sub>6</sub> O <sub>20</sub> Ni <sub>3</sub> | C <sub>72</sub> H <sub>42</sub> N <sub>12</sub> O <sub>18</sub> Ni <sub>3</sub> |
| CCDC                                                                                              | 1996089                                                                           | 1996089                                                                         |
| Formula weight                                                                                    | 1067.91                                                                           | 1761.70                                                                         |
| Crystal system                                                                                    | Trigonal                                                                          | Monoclinic                                                                      |
| Space group                                                                                       | <i>R</i> - <i>3m</i>                                                              | <i>P</i> 2 <sub>1</sub> / <i>n</i>                                              |
| <i>a</i> (Å)                                                                                      | 27.1230(3)                                                                        | 10.13653(10)                                                                    |
| <i>b</i> (Å)                                                                                      | 27.1230(3)                                                                        | 25.9159(2)                                                                      |
| <i>c</i> (Å)                                                                                      | 38.1727(3)                                                                        | 15.63851(15)                                                                    |
| $\alpha$ (°)                                                                                      | 90                                                                                | 90                                                                              |
| $\beta$ (°)                                                                                       | 90                                                                                | 101.0451(9)                                                                     |
| $\gamma$ (°)                                                                                      | 120                                                                               | 90                                                                              |
| <i>V</i> (Å <sup>3</sup> )                                                                        | 24319.7(4)                                                                        | 4032.10(7)                                                                      |
| <i>Z</i>                                                                                          | 18                                                                                | 2                                                                               |
| <i>D</i> <sub>c</sub> (g cm <sup>-3</sup> )                                                       | 1.312                                                                             | 1.451                                                                           |
| $\mu$ (mm <sup>-1</sup> )                                                                         | 1.835                                                                             | 1.548                                                                           |
| <i>F</i> (000)                                                                                    | 9873                                                                              | 1836.0                                                                          |
| Data collected                                                                                    | 24179                                                                             | 22979                                                                           |
| Unique reflections                                                                                | 5146                                                                              | 7947                                                                            |
| Goodness-of-fit on <i>F</i> <sup>2</sup>                                                          | 1.054                                                                             | 1.081                                                                           |
| <i>R</i> <sub>1</sub> , <i>wR</i> <sub>2</sub> [ <i>I</i> > 2 $\sigma$ ( <i>I</i> )] <sup>a</sup> | 0.0561 0.1578                                                                     | 0.0410 0.1222                                                                   |
| <i>R</i> <sub>1</sub> , <i>wR</i> <sub>2</sub> [all data] <sup>b</sup>                            | 0.0577 0.1591                                                                     | 0.0440 0.1242                                                                   |

<sup>a</sup>  $R_1 = \sum ||F_o| - |F_c|| / \sum |F_o|$ . <sup>b</sup>  $wR_2 = \{ \sum [w(F_o^2 - F_c^2)^2] / \sum w(F_o^2)^2 \}^{1/2}$

**Table S1** Selected Bond Lengths (Å) and Bond Angles (°) for Compound **1**

| Bond                                          | Dist.      | Bond                                         | Dist.      | Bond                                         | Dist.      |
|-----------------------------------------------|------------|----------------------------------------------|------------|----------------------------------------------|------------|
| Ni(1)-O(2)                                    | 2.014(2)   | Ni(2)-N(1)                                   | 2.048(3)   | Ni(3)-N(2)                                   | 2.085(5)   |
| Ni(1)-O(1W)                                   | 2.132(2)   | Ni(2)-O(3)                                   | 2.013(2)   | Ni(3)-O(7)                                   | 2.092(6)   |
| Ni(1)-O(3W)                                   | 2.005(3)   | Ni(2)-O(2W)                                  | 2.078(3)   | Ni(3)-O(1)                                   | 2.001(2)   |
| Ni(1)-N(1)                                    | 2.048(3)   | Ni(2)-O(3W)                                  | 2.077(3)   |                                              |            |
| Angle                                         | (°)        | Angle                                        | (°)        | Angle                                        | (°)        |
| O(1W) <sup>#1</sup> -Ni(1)-O(1W)              | 87.61(15)  | N(1)-Ni(1)-O(1W)                             | 89.00(9)   | O(5) <sup>#1</sup> -Ni(2)-O(2W)              | 86.51(10)  |
| O(2)-Ni(1)-O(1W) <sup>#1</sup>                | 87.17(10)  | N(1)-Ni(1)-O(1W) <sup>#1</sup>               | 89.00(9)   | O(5) <sup>#1</sup> -Ni(2)-O(3W)              | 90.56(8)   |
| O(2)-Ni(1)-O(1W)                              | 174.51(10) | O(3)-Ni(2)-O(2W)                             | 89.98(10)  | O(5)-Ni(2)-O(3W)                             | 90.56(8)   |
| O(2) <sup>#1</sup> -Ni(1)-O(1W)               | 87.18(10)  | O(3) <sup>#1</sup> -Ni(2)-O(2W)              | 89.98(10)  | O(5)-Ni(2)-O(5) <sup>#1</sup>                | 87.22(14)  |
| O(2) <sup>#1</sup> -Ni(1)-O(1W) <sup>#1</sup> | 174.51(10) | O(3) <sup>#1</sup> -Ni(2)-O(3)               | 93.53(15)  | O(1)-Ni(3)-O(1) <sup>#2</sup>                | 122.06(14) |
| O(2)-Ni(1)-O(2) <sup>#1</sup>                 | 97.99(13)  | O(3)-Ni(2)-O(3W)                             | 92.79(8)   | O(1) <sup>#2</sup> -Ni(3)-O(6) <sup>#4</sup> | 87.76(9)   |
| O(2) <sup>#1</sup> -Ni(1)-N(1)                | 89.20(9)   | O(3) <sup>#1</sup> -Ni(2)-O(3W)              | 92.79(8)   | O(1)-Ni(3)-O(6) <sup>#3</sup>                | 87.76(9)   |
| O(2)-Ni(1)-N(1)                               | 89.20(9)   | O(3) <sup>#1</sup> -Ni(2)-O(5)               | 175.35(9)  | O(1) <sup>#2</sup> -Ni(3)-O(6) <sup>#3</sup> | 149.70(10) |
| O(3W)-Ni(1)-O(1W)                             | 88.49(8)   | O(3) <sup>#1</sup> -Ni(2)-O(5) <sup>#1</sup> | 89.53(10)  | O(1)-Ni(3)-O(6) <sup>#4</sup>                | 149.70(10) |
| O(3W)-Ni(1)-O(1W) <sup>#1</sup>               | 88.49(8)   | O(3)-Ni(2)-O(5) <sup>#1</sup>                | 175.35(9)  | O(1)-Ni(3)-O(7)                              | 87.02(12)  |
| O(3W)-Ni(1)-O(2)                              | 93.07(8)   | O(3)-Ni(2)-O(5)                              | 89.52(10)  | O(1) <sup>#2</sup> -Ni(3)-O(7)               | 87.01(12)  |
| O(3W)-Ni(1)-O(2) <sup>#1</sup>                | 93.07(8)   | O(3W)-Ni(2)-O(2W)                            | 175.95(14) | O(1)-Ni(3)-N(2)                              | 93.15(11)  |
| O(3W)-Ni(1)-N(1)                              | 176.53(12) | O(5)-Ni(2)-O(2W)                             | 86.51(10)  | O(1) <sup>#2</sup> -Ni(3)-N(2)               | 93.15(11)  |

Symmetry transformation: #1:  $x, x-y+1, z$ ; #2:  $-x+y+1, y, z$ ; #3:  $-x+4/3, -x+y+2/3, -z+2/3$ ; #4:  $y+1/3, -x+y+2/3, -z+2/3$ **Table S2** Selected Bond Lengths (Å) and Bond Angles (°) for Compound **2**

| Bond                                         | Dist.      | Bond                                           | Dist.      | Bond                                          | Dist.      |
|----------------------------------------------|------------|------------------------------------------------|------------|-----------------------------------------------|------------|
| Ni(1)-O(2)                                   | 2.0186(14) | Ni(1)-N(2) <sup>#2</sup>                       | 2.1068(17) | Ni(2)-O(2W)                                   | 2.0632(16) |
| Ni(1)-O(1W)                                  | 2.0367(15) | Ni(1)-O(5) <sup>#1</sup>                       | 2.1362(14) | Ni(2)-O(2W) <sup>#3</sup>                     | 2.0633(16) |
| Ni(1)-N(3)                                   | 2.0918(17) | Ni(2)-O(3W)                                    | 2.0529(17) | Ni(2)-N(1)                                    | 2.1080(19) |
| Ni(1)-O(6) <sup>#1</sup>                     | 2.0924(14) | Ni(2)-O(3W) <sup>#3</sup>                      | 2.0529(17) | Ni(2)-N(1) <sup>#3</sup>                      | 2.1081(19) |
| Angle                                        | (°)        | Angle                                          | (°)        | Angle                                         | (°)        |
| O(2)-Ni(1)-O(1W)                             | 96.13(6)   | O(2)-Ni(1)-O(5) <sup>#1</sup>                  | 101.10(6)  | O(2W)-Ni(2)-O(2W) <sup>#3</sup>               | 180.0      |
| O(2)-Ni(1)-N(3)                              | 87.13(6)   | O(1W)-Ni(1)-O(5) <sup>#1</sup>                 | 162.74(6)  | O(3W)-Ni(2)-N(1)                              | 90.48(7)   |
| O(1W)-Ni(1)-N(3)                             | 90.90(6)   | N(3)-Ni(1)-O(5) <sup>#1</sup>                  | 90.76(6)   | O(3W) <sup>#3</sup> -Ni(2)-N(1)               | 89.52(7)   |
| O(2)-Ni(1)-O(6) <sup>#1</sup>                | 163.85(6)  | O(6) <sup>#1</sup> -Ni(1)-O(5) <sup>#1</sup>   | 62.84(5)   | O(2W)-Ni(2)-N(1)                              | 89.33(7)   |
| O(1W)-Ni(1)-O(6) <sup>#1</sup>               | 99.91(6)   | N(2) <sup>#2</sup> -Ni(1)-O(5) <sup>#1</sup>   | 85.99(6)   | O(2W) <sup>#3</sup> -Ni(2)-N(1)               | 90.67(7)   |
| N(3)-Ni(1)-O(6) <sup>#1</sup>                | 94.43(6)   | O(3W)-Ni(2)-O(3W) <sup>#3</sup>                | 180.00(8)  | O(3W)-Ni(2)-N(1) <sup>#3</sup>                | 89.52(7)   |
| O(2)-Ni(1)-N(2) <sup>#2</sup>                | 86.15(7)   | O(3W)-Ni(2)-O(2W)                              | 92.11(7)   | O(3W) <sup>#3</sup> -Ni(2)-N(1) <sup>#3</sup> | 90.48(7)   |
| O(1W)-Ni(1)-N(2) <sup>#2</sup>               | 94.43(6)   | O(3W) <sup>#3</sup> -Ni(2)-O(2W)               | 87.89(7)   | O(2W)-Ni(2)-N(1) <sup>#3</sup>                | 90.67(7)   |
| N(3)-Ni(1)-N(2) <sup>#2</sup>                | 171.84(7)  | O(3W)-Ni(2)-O(2W) <sup>#3</sup>                | 87.89(7)   | O(2W) <sup>#3</sup> -Ni(2)-N(1) <sup>#3</sup> | 89.33(7)   |
| O(6) <sup>#1</sup> -Ni(1)-N(2) <sup>#2</sup> | 90.75(6)   | O(3W) <sup>#3</sup> -Ni(2)-O(2W) <sup>#3</sup> | 92.11(7)   | N(1)-Ni(2)-N(1) <sup>#3</sup>                 | 180.00(11) |

Symmetry transformation: #1:  $x+1, y, z$ ; #2:  $-x+3/2, y+1/2, -z+1/2$ ; #3:  $-x+2, -y+1, -z+2$ ; #4:  $x-1, y, z$

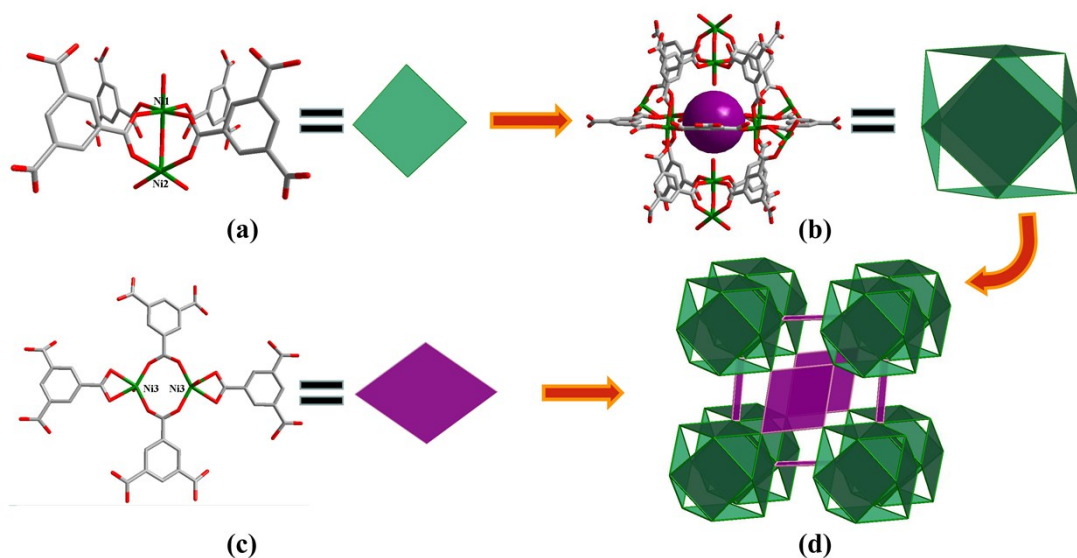

**Fig. S1** (a) Square shaped SBU constructed with binuclear nickel (Ni1, Ni2) and four BTC<sup>3-</sup> ligands in **1**. (b) Cubohemioctahedra supermolecular building block (SBB) assembled by square SBUs in **1**. (c) Another square SBU constructed with two Ni3 and four BTC<sup>3-</sup> ligands in **1**. (d) Schematic view of the ftw-a-like topology of **1**.

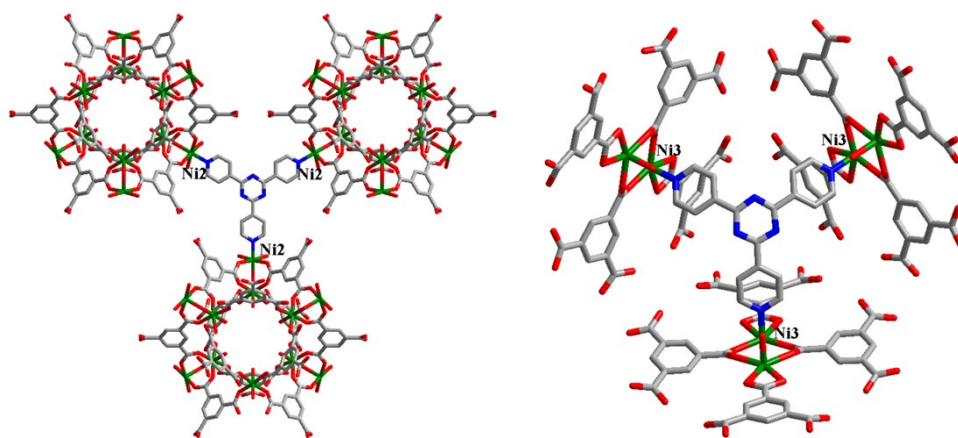

**Fig. S2** Two types of TPT ligands depending on different connections in **1**

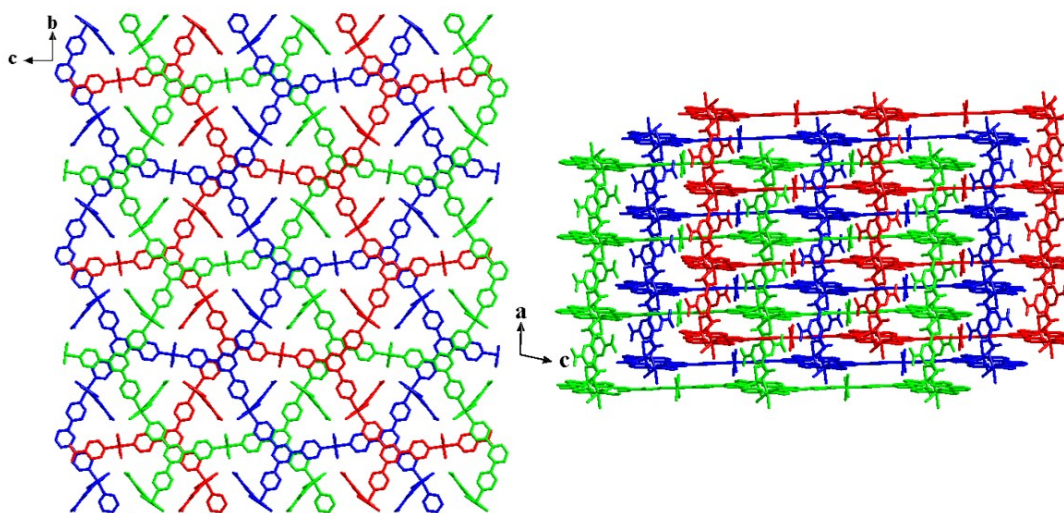

**Fig. S3** 3-fold interpenetrated structure of compound **2** view along the *a* axis and *b* axis.

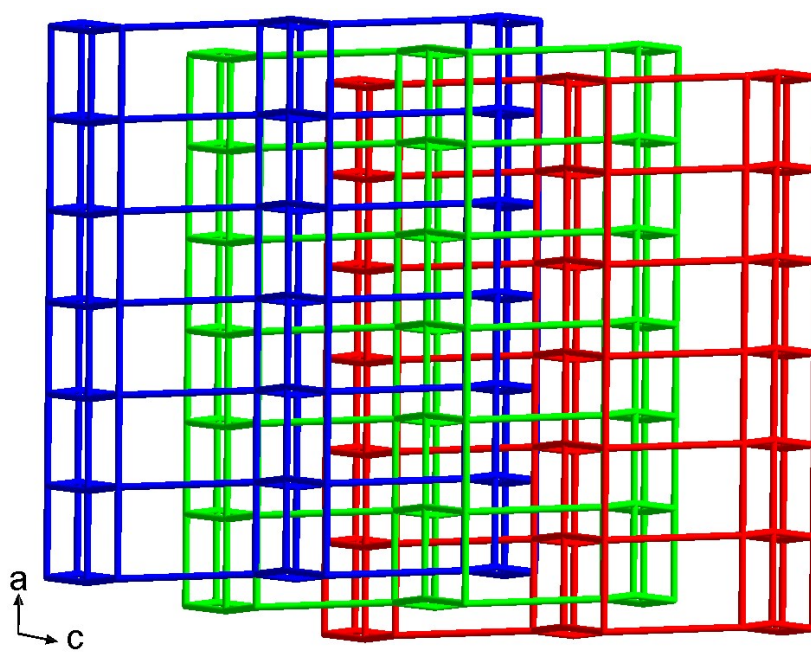

**Fig. S4** Schematic view of topological representation of **2**.

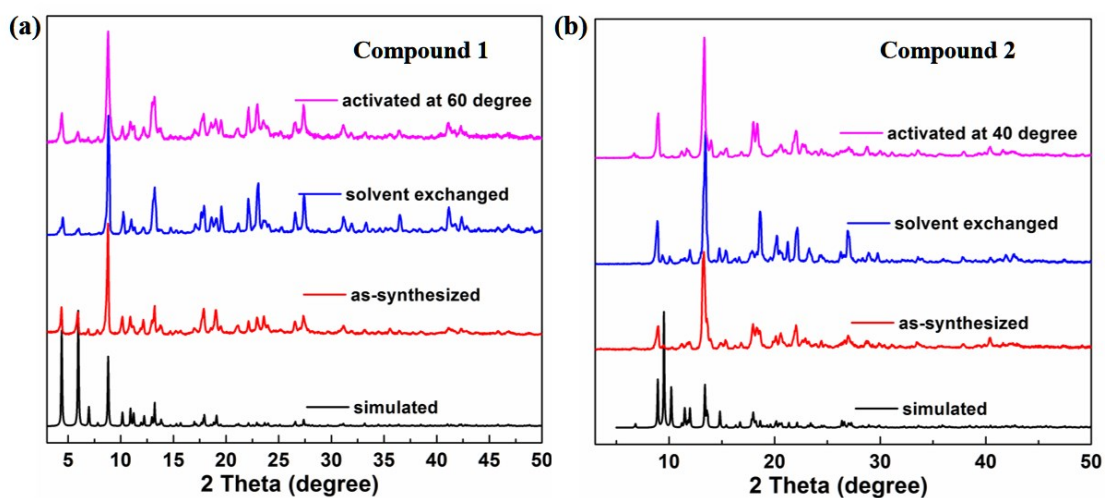

Fig. S5 (a) PXRD patterns of 1. (b) PXRD patterns of 2.

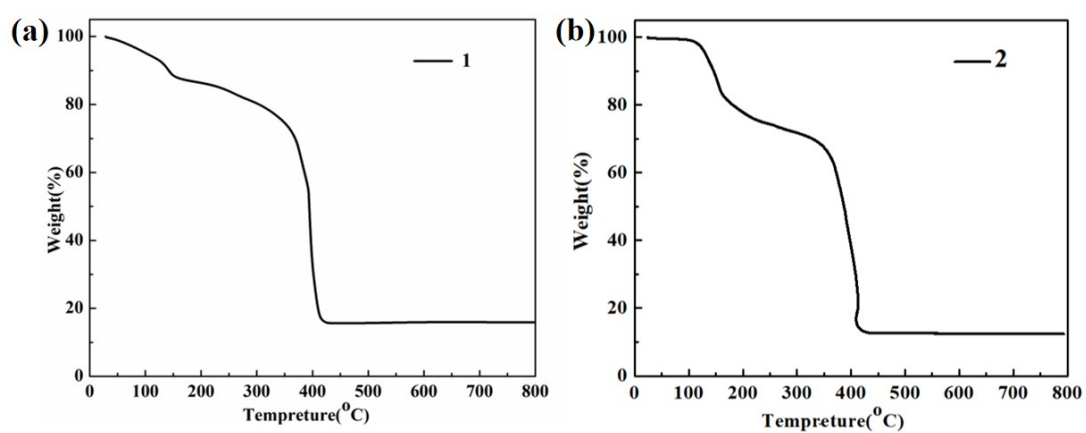

Fig. S6 (a) TGA curve of as-synthesized 1. (b) TGA curve of as-synthesized 2.

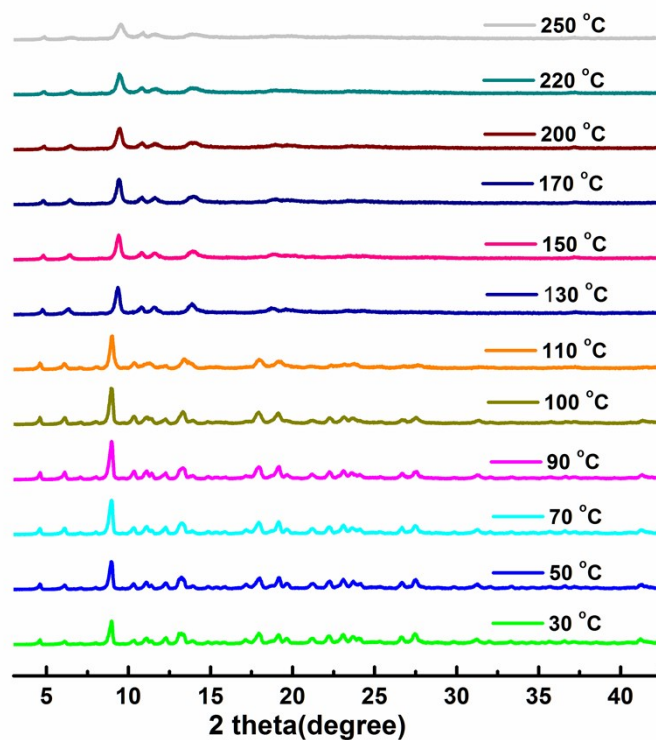

Fig. S7 In-situ PXRD patterns of as-synthesized **1** under variable temperatures.

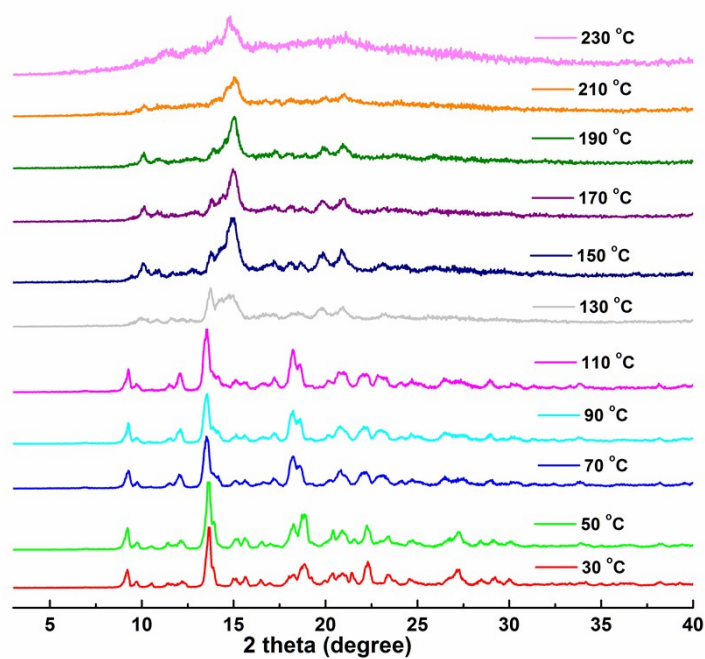

Fig. S8 In-situ PXRD patterns of as-synthesized **2** under variable temperatures.
